# Supplementary material for: Metabolic engineering of Saccharomyces cerevisiae for production of very long chain fatty acid-derived chemicals
Source: PubMed Central journal article supplement (PMC5458556; doi:10.1038/ncomms15587), 2017-05-26
Supplement: ncomms15587-s1.pdf [file ncomms15587-s1.pdf]

1

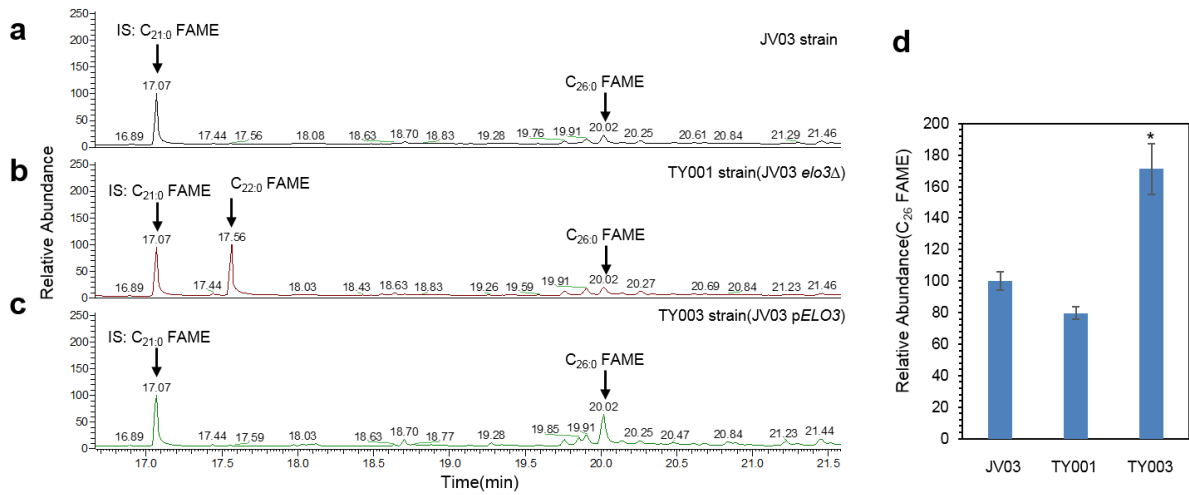

2

3 Supplementary Fig. 1. Fatty acid chain length profiles of VLCFA-producing JV03 and derived strains.  
4 Typical GC-MS total ion chromatograms (TIC) of total fatty acids extracted from JV03 cells (a), TY001  
5 (JV03 *elo3*Δ) (b) and strain TY003 (JV03 *pELO3*) (c). (d) Relative quantification of total FA (C<sub>26</sub> FAME)  
6 generated by yeast elongation system in strains JV03, TY001 and TY003. Statistical analysis was  
7 performed using a Student's t-Test (one-tailed; \*,  $p < 0.05$ ; \*\*,  $p < 0.01$  and \*\*\*,  $p < 0.001$ ; Two-sample  
8 unequal variance). At least two independent measurements were performed for each experiment, and  
9 the the mean  $\pm$  s.d of 3 biological replicates of a representative measurement is shown. Total fatty  
10 acids were identified by retention time and comparison with the mass spectral library. All cells were  
11 grown as described in experimental procedures.

12

13

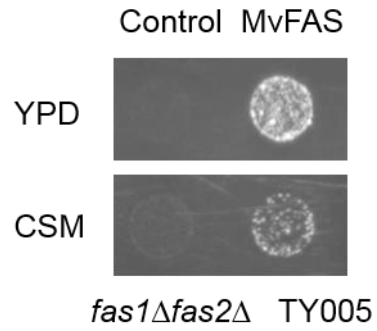

14

15 Supplementary Fig. 2. Complementation with the MvFAS restores the growth of a *fas1Δ/fas2Δ* strain.

16 Spot assays of the *fas1Δ/fas2Δ* strain without or with expression of *mvfas* (strain TY005) on YPD or

17 CSM plates. The plates were incubated at 30°C and recorded photographically 3 days after inoculation.

18

19

20

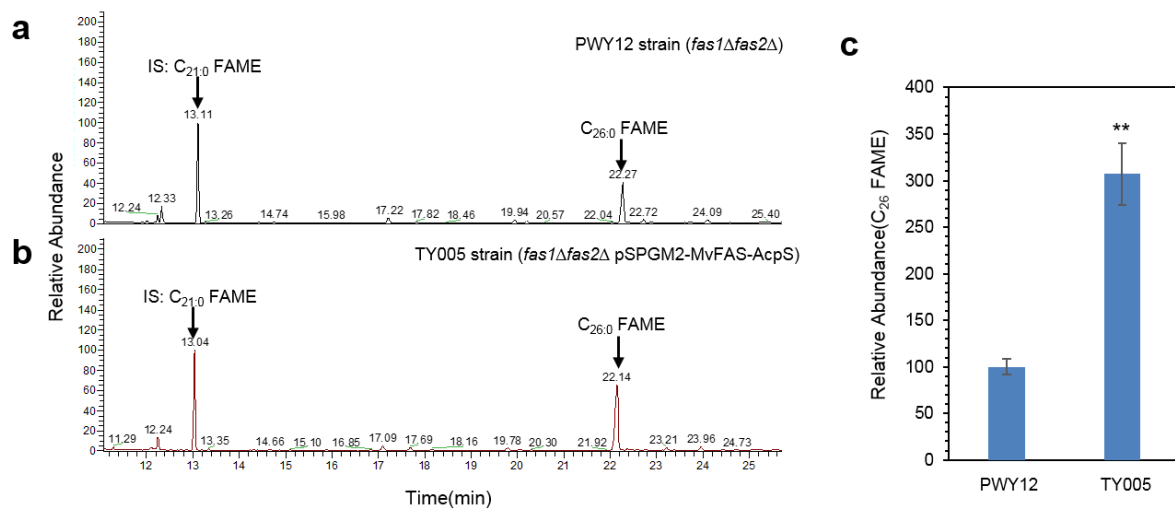

21

22 Supplementary Fig. 3. Fatty acid chain length profiles of VLCFA-producing *fas1Δ/fas2Δ* strains. Typical  
23 GC-MS total ion chromatograms (TIC) of total fatty acids extracted from PWY12 (*fas1Δ/fas2Δ*) (**a**), or  
24 with plasmid pSPGM2-MvFAS-AcpS (strain TY005) (**b**). Total fatty acids were identified by retention  
25 time and comparison with the mass spectral library. (**c**) Relative quantification of total FA (C<sub>26</sub> FAME)  
26 generated by strains PWY12 and TY005. Statistical analysis was performed using a Student's t-Test  
27 (one-tailed; \*,  $p < 0.05$ ; \*\*,  $p < 0.01$  and \*\*\*,  $p < 0.001$ ; Two-sample unequal variance). At least two  
28 independent measurements were performed for each experiment, and the the mean  $\pm$  s.d of 3  
29 biological replicates of a representative measurement is shown. All cells were grown as described in  
30 experimental procedures.

31

32

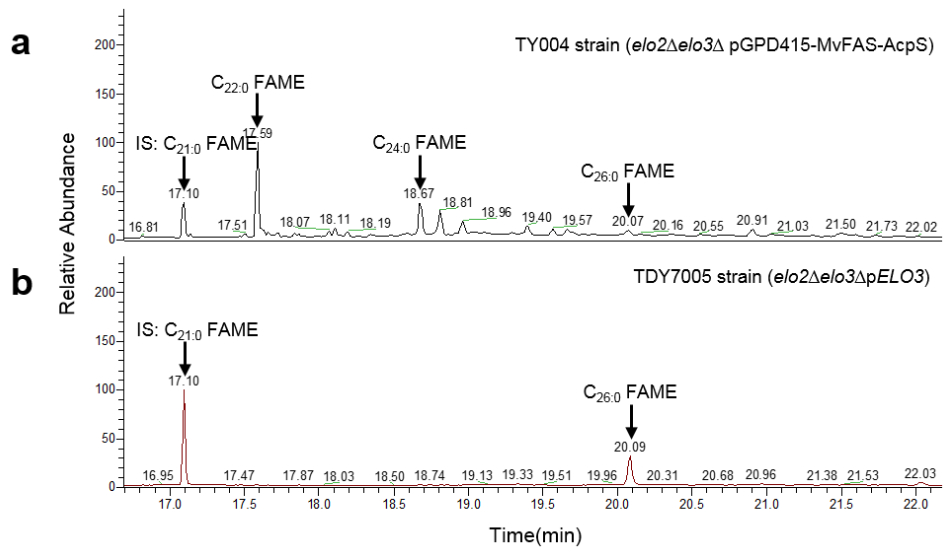

33

34 Supplementary Fig. 4. Fatty acid chain length profiles of VLCFA-producing *elo2Δ/elo3Δ* strains. Typical  
 35 GC-MS total ion chromatograms (TIC) of total fatty acids extracted from TDY7005 (*elo2Δ/elo3Δ*)  
 36 carrying p415GPD-MvFAS-AcpS (strain TY004) **(a)**, or the control plasmid pELO3 (strain TDY7005) **(b)**.  
 37 Total fatty acids were identified by retention time and comparison with the mass spectral library. All  
 38 cells were grown as described in experimental procedures.

39

40

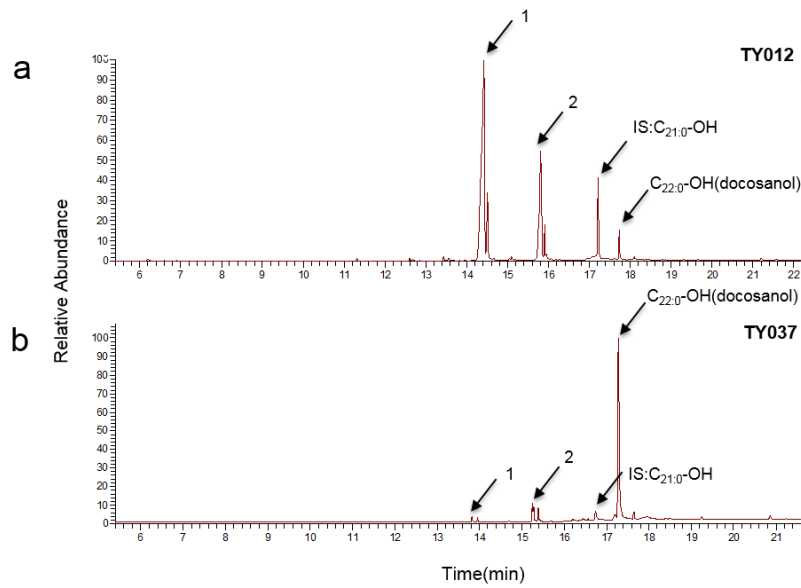

41

42 Supplementary Fig. 5. Fatty alcohol profiles of docosanol producing strains. **(a)** Typical GC-MS total ion  
 43 chromatogram (TIC) of fatty alcohol extracted from starting strain TY012 (JV03 *elo3Δ* pELO2 pAtFAR).  
 44 **(b)** Typical GC-FID total ion chromatograms (TIC) of fatty alcohol extracted from the best docosanol  
 45 producer strain TY037 (MATa *ura3-52 can1Δ::cas9-natNT2 TRP1 LEU2 HIS3 gal1Δ::ACC1\*\**  
 46 *elo3Δ::AtFAR ELO2 ELO1/pSPGM2-MvFAS-AcpS*) (Fig 5b). Both samples were spiked with the same  
 47 amounts of internal standard. 1, C<sub>16:0</sub> and C<sub>16:1</sub> fatty acid. 2, C<sub>18:0</sub> and C<sub>18:1</sub> fatty acid. Fatty alcohols were  
 48 identified by retention time and comparison with the mass spectral library. All cells were grown and  
 49 induced as described in experimental procedures.

50

51

*S. cerevisiae* FAS

$\beta$ -chain (1888aa)

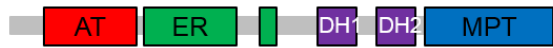

$\alpha$ -chain (2052aa)

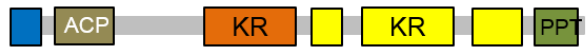

*M. vaccae* FAS (3089aa)

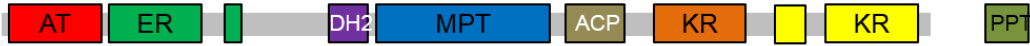

AcpS (134aa)

52

53 Supplementary Fig. 6. Schematic alignment of *MvFAS* and *ScFAS* drawn to scale (modified from<sup>1</sup>). The  
54 major domains of the two FASs are labelled. The PPT domain of *MvFAS* is encoded by gene *acps*. *S.*  
55 *cerevisiae* (*Saccharomyces cerevisiae*); *M. vaccae* (*Mycobacterium vaccae*); ACP (Acyl carrier protein);  
56 KR (Ketoacyl reductase); KS (Ketoacyl synthase); PPT (Phosphopantetheinyl transferase); AT (Acetyl  
57 transferase); ER (Enoyl reductase); DH (Dehydratase); MPT (Malonyl/palmitoyl transferase).

58

59

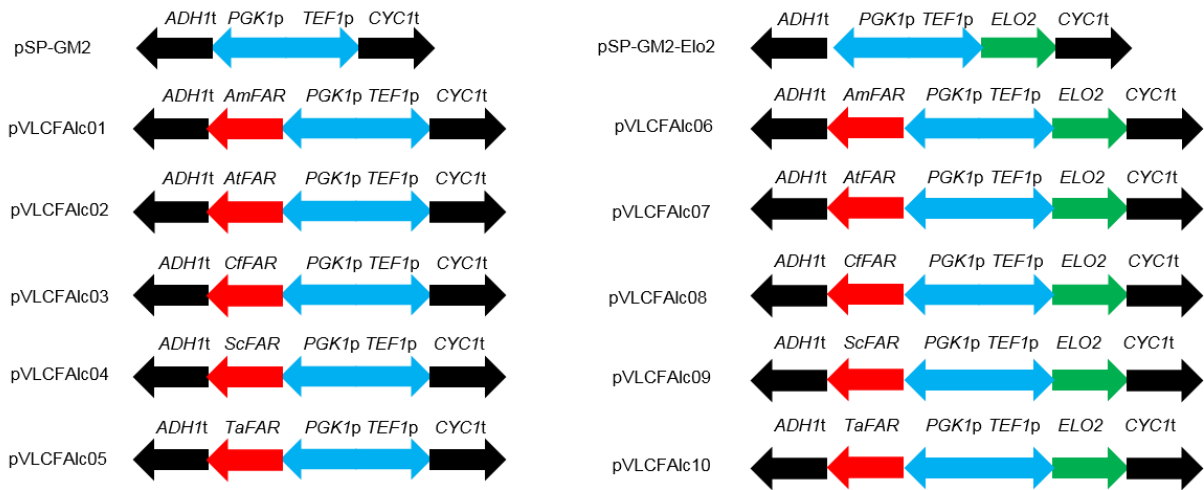

60

61 Supplementary Fig. 7. Genetic constructs used in FAR screening. Graphical representation of the  
 62 *amfar*, *atfar*, *cffar*, *scfar* and *tafar* gene constructs used for screening C<sub>22</sub> specifically FAR enzyme.  
 63 The genetic sequences for *amfar*, *atfar*, *cffar*, *scfar* and *tafar* were codon optimized for expression in  
 64 *S. cerevisiae* and synthesized by GenScript, Inc.

65

66

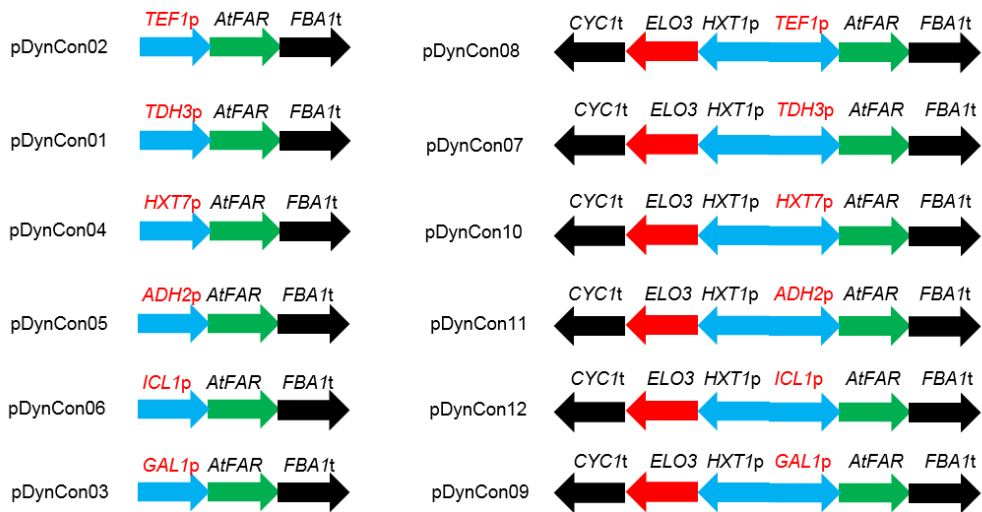

67

68 Supplementary Fig. 8. Genetic constructs used in promoter screening (dynamic control). Graphical  
 69 representation of the *TEF1p*, *TDH3p*, *HXT7p*, *ADH2p*, *ICL1p* and *GAL1p* constructs used to screen for  
 70 the best promoter combinations for the dynamic control system. All the promoters were amplified  
 71 from *S. cerevisiae* CEN.PK113-5D genome DNA.

72

73



74

75

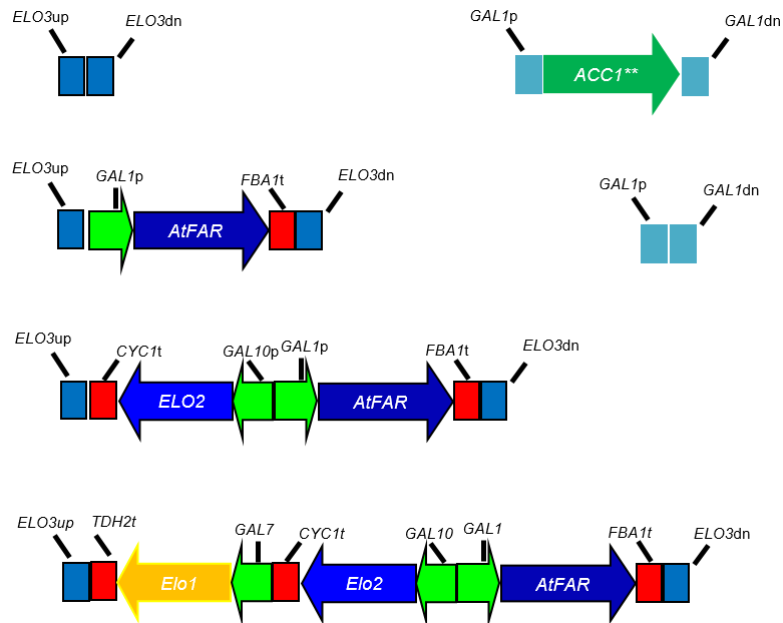

76

77

78 Supplementary Fig. 9. Schematic illustration summarizing the genetic arrangement of genomic  
79 integration constructs of target pathway genes. All the promoters and terminators were amplified  
80 from *S. cerevisiae* CEN.PK113-5D genome DNA.

81

82

83

84

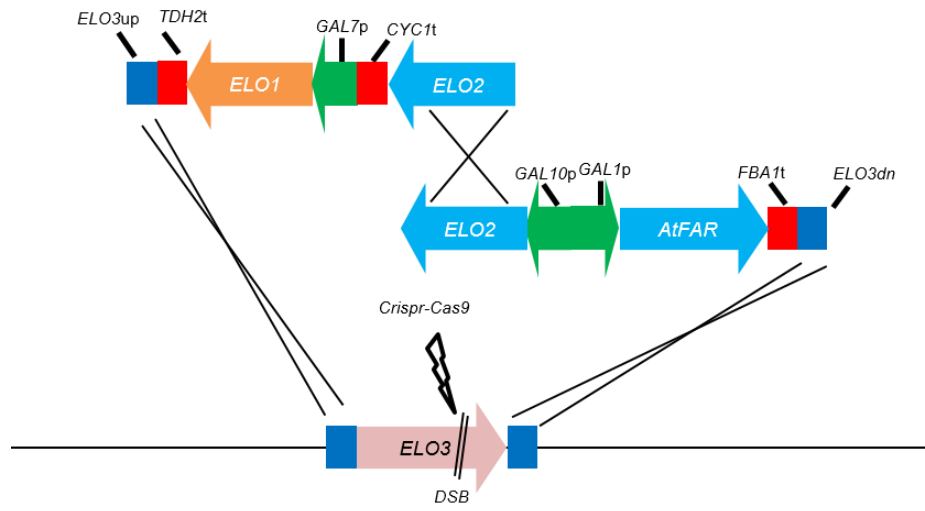

85

86

87 Supplementary Fig. 10. Schematic illustration of genome engineering strategy for gene deletion  
88 coupled with gene integration via CRISPR/Cas9.

89

90

91 Supplementary Table 1. Product specificity of FAS I system from different *Mycobacterium* species<sup>2, 3</sup>

| 92  | species          | Pyrolytic cleavage products of a-mycolate |       | species               | Pyrolytic cleavage products of a-mycolate |       |
|-----|------------------|-------------------------------------------|-------|-----------------------|-------------------------------------------|-------|
| 93  | aurum            | C22:0                                     |       | thermoresistibile     | C22:0                                     | C24:0 |
|     | austroafricanum  | C22:0                                     |       | tokaiense             | C22:0                                     | C24:0 |
| 94  | brumane          | C22:0                                     |       | ulcerans              | C22:0                                     | C24:0 |
|     | diernhoferi      | C22:0                                     |       | vaccae                | C22:0                                     | C24:0 |
| 95  | fallax           | C22:0                                     |       | absessus              |                                           | C24:0 |
|     | gilvum           | C22:0                                     |       | agri                  |                                           | C24:0 |
| 96  | neoaurum         | C22:0                                     |       | agri                  |                                           | C24:0 |
|     | parafortuitum    | C22:0                                     |       | asiaticum             |                                           | C24:0 |
| 97  | alvei            | C22:0                                     | C24:0 | avium subsp. Avium    |                                           | C24:0 |
|     |                  |                                           |       | avium subsp.          |                                           |       |
| 98  | chitae           | C22:0                                     | C24:0 | Paratuberculosis      |                                           | C24:0 |
|     | chubuense        | C22:0                                     | C24:0 | chelonae              |                                           | C24:0 |
| 99  | confluentis      | C22:0                                     | C24:0 | farcinogenes          |                                           | C24:0 |
|     | cookii           | C22:0                                     | C24:0 | fortuitum             |                                           | C24:0 |
| 100 | duvalii          | C22:0                                     | C24:0 | kansasii              |                                           | C24:0 |
|     | flavescens       | C22:0                                     | C24:0 | komossense            |                                           | C24:0 |
| 101 | gadium           | C22:0                                     | C24:0 | lepramurim            |                                           | C24:0 |
|     | gastri           | C22:0                                     | C24:0 | marinum               |                                           | C24:0 |
| 102 | gilvum           | C22:0                                     | C24:0 | phlei                 |                                           | C24:0 |
|     | gordonae         | C22:0                                     | C24:0 | shimoidei             |                                           | C24:0 |
| 103 | haemophilum      | C22:0                                     | C24:0 | simiae                |                                           | C24:0 |
|     | hibernae         | C22:0                                     | C24:0 | szulgai               |                                           | C24:0 |
| 104 | intermedium      | C22:0                                     | C24:0 | terrae                |                                           | C24:0 |
|     | intracellulare   | C22:0                                     | C24:0 | thermoresistibile lab |                                           | C24:0 |
| 105 | leprae           | C22:0                                     | C24:0 | triviale              |                                           | C24:0 |
|     | mucogenicum      | C22:0                                     | C24:0 | celatum               |                                           | C24:0 |
| 106 | nonchromogenicum | C22:0                                     | C24:0 | interjectum           |                                           | C24:0 |
|     | obuense          | C22:0                                     | C24:0 | malmoense             |                                           | C24:0 |
| 107 | pulveris         | C22:0                                     | C24:0 | microti               |                                           | C24:0 |
|     | rhodesiae        | C22:0                                     | C24:0 | tuberculosis          |                                           | C24:0 |
| 108 | rhodesiae        | C22:0                                     | C24:0 | africanum             |                                           | C26:0 |
|     | scrofulaceum     | C22:0                                     | C24:0 | bovis                 |                                           | C26:0 |
| 109 | smegmatis        | C22:0                                     | C24:0 | bovis BCG             |                                           | C26:0 |
|     | sphagni          | C22:0                                     | C24:0 | xenopi                |                                           | C26:0 |

110

111

112 Supplementary Table 2. Fatty acyl-CoA reductase screening in different background strains

| FARs              | JV03 <i>elo3</i> Δ strain |              |              |              |              | control | JV03 <i>elo3</i> Δ pELO2 strain |              |              |              |              |
|-------------------|---------------------------|--------------|--------------|--------------|--------------|---------|---------------------------------|--------------|--------------|--------------|--------------|
|                   | <i>AmFAR</i>              | <i>AtFAR</i> | <i>CfFAR</i> | <i>ScFAR</i> | <i>TaFAR</i> |         | <i>AmFAR</i>                    | <i>AtFAR</i> | <i>CfFAR</i> | <i>ScFAR</i> | <i>TaFAR</i> |
| OD <sub>600</sub> | 3.20                      | NS*          | 4.34         | 5.29         | 0.53         | 5.41    | 3.15                            | 0.29         | 3.13         | 3.47         | 3.46         |
| Docosanol(mg/L)   | ND <sup>†</sup>           | ND           | ND           | ND           | ND           | ND      | ND                              | 1.13         | ND           | ND           | ND           |
| Strain name       | TY006                     | TY007        | TY008        | TY009        | TY010        | TY001   | TY011                           | TY012        | TY013        | TY014        | TY015        |

113 ND\*: Not detected; NS<sup>†</sup>: No survival colony

114

115

116

117 Supplementary Table 3. Evaluation of different designs for dynamic control strategies

| Promoters                        | JV03 <i>elo3Δ</i> |              |              |              |              |              | control   | JV03 <i>elo3Δ</i> <i>HXT1p-ELO3</i> |              |              |              |              |              |
|----------------------------------|-------------------|--------------|--------------|--------------|--------------|--------------|-----------|-------------------------------------|--------------|--------------|--------------|--------------|--------------|
|                                  | <i>TDH3p</i>      | <i>TEF1p</i> | <i>GAL1p</i> | <i>HXT7p</i> | <i>ADH2p</i> | <i>ICL1p</i> |           | <i>TDH3p</i>                        | <i>TEF1p</i> | <i>GAL1p</i> | <i>HXT7p</i> | <i>ADH2p</i> | <i>ICL1p</i> |
| OD <sub>600</sub>                | 0                 | 0            | 6.59±0.19    | 0            | 0            | 0            | 8.71±0.38 | 7.86±0.20                           | 7.7±0.28     | 8.45±0.25    | 8.11±0.47    | 7.21±1.4     | 8.43±0.12    |
| Docosanol(mg/L)                  | 0                 | 0            | 4.19±0.20    | 0            | 0            | 0            | 0         | 0                                   | 0            | 0            | 0.80±0.07    | 0.15±0.02    | 0            |
| Docosanol(mg/OD <sub>600</sub> ) | 0                 | 0            | 12.85±0.55   | 0            | 0            | 0            | 0         | 0                                   | 0            | 0            | 2.09±0.19    | 0.54±0.04    | 0            |
| Strains                          | TY016             | TY017        | TY018        | TY019        | TY020        | TY021        | TY001     | TY022                               | TY023        | TY024        | TY025        | TY026        | TY027        |

118

119 Supplementary Table 4. Primers used in this study

| Primer | Description                       | Sequence(5'-3')                                                                                                          |
|--------|-----------------------------------|--------------------------------------------------------------------------------------------------------------------------|
| pTY001 | Del1-F                            | GACAACCCTTAATTACCGTTCGTATAATG                                                                                            |
| pTY002 | Del1-R                            | CAACCTATTAATTTCCCCTCGTCA                                                                                                 |
| pTY003 | Del2-F                            | GGCAAAACAGCATTCCAGGT<br>GGATCTGATATACCGTTCGTATAGCATAACATTATACGAAGTTATTCATA<br>TAGGGCGAATTGGGTAC                          |
| pTY004 | Del2-R                            | AGCAGAATTATGAATAATAAACATTGATGACAATAG                                                                                     |
| pTY005 | Elo3up-F                          | ACATTATACGAACGTAATTAAGGGTTGTCGACTGTTTATGTTTCGTAA                                                                         |
| pTY006 | Elo3up-R                          | ACAAACGG<br>TGTATGCTATACGAACGGTATATCAGATCC ATA GGA AGC GAG AAT                                                           |
| pTY007 | Elo3dw-F Primer                   | TTT TGA CAG CG                                                                                                           |
| pTY008 | Elo3dw-R Primer                   | TAGATAATGATGCTGGGCCGATAATTAG                                                                                             |
| pTY009 | Chromosome XII<br>before Elo3JD-F | TGCGTCGTTAGATTTCTGGGGTTAAGATAGCAAC                                                                                       |
| pTY010 | Chromosome XII<br>behind Elo3JD-R | TATTGGAGAGCTAGAACAACCAATGAACTTCATTGAAGAG                                                                                 |
| pTY011 | p-vectorBamH1-R                   | TGTCATTGTTTTGTGAGTCGTATTACGGATCC                                                                                         |
| pTY012 | p-vectorSma1fusion-F              | TTGCAGTATTGGAAGAAAGATAAGCGTCGACATGGAACAGAAG                                                                              |
| pTY013 | P-MvFAS2-Gibson-F                 | GGATCCGTAATACGACTCACAAAACAATGACAATCAACGATCAACATAG                                                                        |
| pTY014 | P-MvFAS2-Gibson-R                 | TGTATGATCAGCGACCTTTTCTGGGTCCTTCAACGGAGA                                                                                  |
| pTY015 | P-MvFAS3-Gibson-F                 | TCTCCGTTGAATGGGACCCAGAAAAGGTCGCTGATCATACA                                                                                |
| pTY016 | P-MvFAS3-Gibson-R                 | GCAATACTACCTTTGGAGGCACCTGTGACTACTGCAACTTCATCA                                                                            |
| pTY017 | P-MvFAS4-Gibson-F                 | TGATGAAGTTGCAGTAGTCACAGGTGCCTCCAAAGGTAGTATTGC                                                                            |
| pTY018 | P-MvFAS4-AcpS-R                   | CTGAACCGCCACCACCTGATCTTCTGTAAACACCATTTTTAC<br>TCAGGTGGTGGCGGTTTCAGGCGGAGGTGGCTCTGGCGGTGGCGGATC<br>GATGTTGCCAGTCGGTATAGTT |
| pTY019 | AcpSfusion-F                      | CTTCTGTTCCATGTCGACGCTTATCTTTCTTCCAATACTGCAA                                                                              |
| pTY020 | AcpSfusion-R                      | ATCATTATCAATACTGCCATTTT                                                                                                  |
| pTY021 | GPD-F                             | CTATGTTGATCGTTGATTGTCATTAGTTCTAGATCCGTCGAAAC                                                                             |
| pTY022 | GPD-R                             | GTTTCGACGGATCTAGAATAATGACAATCAACGATCAACATAG                                                                              |
| pTY023 | MvFAS-fragment2-F                 | CATAGCAATCTAATCTAAGTTTTAATTACAAGGATCAAACAATGAATTC<br>ACTCGTTACTCAATA                                                     |
| pTY024 | ELO2-F                            | TCGACGCCCCGGCCCTATAGTGAGTCGTATTACGGATCTTACCTTTTTCT                                                                       |
| pTY025 | ELO2-R                            | TCTGTGTTGAG<br>ATCTTATCGTCGTCATCCTTGTAATCCATCGATACTAGTTTACATGTATCT                                                       |
| pTY026 | CfFAR-F                           | TCTTGAACCTG<br>TCTACTTTTTACAACAAATATAAAACAAGCGGCCGCAAACAATGGAAG                                                          |
| pTY027 | CfFAR-R                           | TTAACAACAACCTCAC<br>ATCTTATCGTCGTCATCCTTGTAATCCATCGATACTAGTTTATTGTTTCAA                                                  |
| pTY028 | AT5g22500-F                       | AACATGTGTGAT<br>TCTACTTTTTACAACAAATATAAAACAAGCGGCCGCAAACAATGGAAT                                                         |
| pTY029 | AT5g22500-R                       | CTAATTGTGTTCAATTC<br>ATCTTATCGTCGTCATCCTTGTAATCCATCGATACTAGTGTTCATACAT                                                   |
| pTY030 | ScFAR-F                           | GTTCAACGACA                                                                                                              |

|        |             |                                                                         |
|--------|-------------|-------------------------------------------------------------------------|
| pTY031 | ScFAR-R     | TCTACTTTTTACAACAAATATAAAACAAGCGGCCGCAAACAATGGAAG<br>AAATGGGTTCAATCT     |
| pTY032 | TaFAR-F     | ATCTTATCGTCGTCATCCTTGTAATCCATCGATACTAGTTTTCAACATGTA<br>TTTTATGACACC     |
| pTY033 | TaFAR-R     | TCTACTTTTTACAACAAATATAAAACAAGCGGCCGCAAACAATGGTTG<br>ATACATTGTCTGAAG     |
| pTY034 | AmFAR-F     | ATCTTATCGTCGTCATCCTTGTAATCCATCGATACTAGTAATTTGATAGT<br>AAGACGTGTAAG      |
| pTY035 | AmFAR-R     | TCTACTTTTTACAACAAATATAAAACAAGCGGCCGCAAACAATGTCAA<br>CTATTTCCGATAATCAATG |
| pTY036 | Kpn1ADH2p-F | CAGTGAGCGCGCGTAATACGACTCACTATAGGGCGAATTGGCAAACG<br>TAGGGGCAAACA         |
| pTY037 | HXT1ADH2p-F | TAGTCGGTGCATATGAATTGAAGTTTCATTGTGGCGCAAACGTAGGG<br>GCAAACA              |
| pTY038 | ADH2p-R     | GTCTTATTACCCAAGAATTGAACACAATTAGATTCCATTGTTTTGTGTA<br>TTACGATATAGTTAATAG |
| pTY039 | Kpn1ICL1p-F | CAGTGAGCGCGCGTAATACGACTCACTATAGGGCGAATTGTGGAAATG<br>TAAAGGATAATGAGTG    |
| pTY040 | HXT1ICL1p-F | TAGTCGGTGCATATGAATTGAAGTTTCATTGTGGCTGGAAATGTAAAGG<br>ATAATGAGTG         |
| pTY041 | ICL1p-R     | GTCTTATTACCCAAGAATTGAACACAATTAGATTCCATTGTTTTCGTTGA<br>CTTTTTGTTATGTTATG |
| pTY042 | Kpn1GAL1p-F | CAGTGAGCGCGCGTAATACGACTCACTATAGGGCGAATTGCGGATTAG<br>AAGCCGCCGAG         |
| pTY043 | HXT1GAL1p-F | TAGTCGGTGCATATGAATTGAAGTTTCATTGTGGCCGATTAGAAGCCG<br>CCGAG               |
| pTY044 | GAL1p-R     | GTCTTATTACCCAAGAATTGAACACAATTAGATTCCATTGTTTTCTCCTTG<br>ACGTTAAAGTATAGAG |
| pTY045 | Kpn1TEF1p-F | CAGTGAGCGCGCGTAATACGACTCACTATAGGGCGAATTGATAGCTTCA<br>AAATGTTTCTACTC     |
| pTY046 | HXT1TEF1p-F | TAGTCGGTGCATATGAATTGAAGTTTCATTGTGGCATAGCTTCAAATG<br>TTTCTACTC           |
| pTY047 | Kpn1HXT7-F  | CAGTGAGCGCGCGTAATACGACTCACTATAGGGCGAATTGAATAGTAC<br>TCTCATCGCTAAGATC    |
| pTY048 | HXT1HXT7-F  | TAGTCGGTGCATATGAATTGAAGTTTCATTGTGGCATAGCTTCAAATG<br>TTTCTACTC           |
| pTY049 | Kpn1TDH3p-F | CAGTGAGCGCGCGTAATACGACTCACTATAGGGCGAATTGTCGAGTTTA<br>TCATTATCAATACTG    |
| pTY050 | HXT1TDH3p-F | TAGTCGGTGCATATGAATTGAAGTTTCATTGTGGCATAGCTTCAAATG<br>TTTCTACTC           |
| pTY051 | AtFAR-F     | ATGGAATCTAATTGTGTTCAATTC                                                |
| pTY052 | AtFARFBA1-R | AAACTATATCAATTAATTTGAATTAACCTATTGTTTCAAACATGTGTGA<br>TC                 |
| pTY053 | 5FBA1-F     | GATCACACATGTTTTGAAACAATAAGTTAATTCAAATTAATTGATATAGT<br>TT                |

|        |                |                                                                                                                                                                                     |
|--------|----------------|-------------------------------------------------------------------------------------------------------------------------------------------------------------------------------------|
| pTY054 | 5FBA1-R        | CAAGCGCGCAATTAACCCCTCACTAAAGGGAACAAAAGCTGAGTAAGCT<br>ACTATGAAAGACTT                                                                                                                 |
| pTY055 | Hind111Elo3-F  | GACATAACTAATTACATGACTCGAGGTCGACGGTATCGATTTAAGCTTT<br>CCTGGAAGAGAC                                                                                                                   |
| pTY056 | Hind111Elo3-R  | CAACTAGTTGATATACGTAAAATCAAACAATGAACACTACCACATCTA<br>CTG                                                                                                                             |
| pTY057 | 3HXT1p-F       | CAGTAGATGTGGTAGTGTTTCATTGTTTTGATTTTACGTATATCAACTAGT<br>TG                                                                                                                           |
| pTY058 | 3HXT1p-R       | GCCACAATGAAACTTCAATTCA                                                                                                                                                              |
| pTY059 | HXT1TEF1p-F    | TAGTCGGTCGATATGAATTGAAGTTTCATTGTGGCATAGCTTCAAATG<br>TTTCTACTC                                                                                                                       |
| pTY060 | TEF1p-R        | GTCCTATTACCCAAGAATTGAACACAATTAGATTCCATTTTGTAATTA<br>ACTTAGATTAG                                                                                                                     |
| pTY061 | HXT1TDH3p-F    | TAGTCGGTCGATATGAATTGAAGTTTCATTGTGGC                                                                                                                                                 |
| pTY062 | TDH3-R         | TCGAGTTTATCATTATCAATACTG                                                                                                                                                            |
| pTY063 | HXT1HXT7-F     | GTCCTATTACCCAAGAATTGAACACAATTAGATTCCATTTTGTTGTTTAT<br>GTGTGTTTATTC                                                                                                                  |
| pTY064 | HXT7-R         | TAGTCGGTCGATATGAATTGAAGTTTCATTGTGGCAATAGTACTCTCATC<br>GCTAAGATC                                                                                                                     |
| pTY065 | Elo3repair-F   | GTCCTATTACCCAAGAATTGAACACAATTAGATTCCATTTTTTGATTA<br>ATTAATAAAAACT                                                                                                                   |
| pTY066 | Elo3repair-R   | AGCTTACTTCTAGTTTATTTATTCGGCTTTTTTCCGTTTGTTACGAAACA<br>TAAACAGTCATAGGAAGCGAGAATTTTGACAGCGAATGAAAAAGAAA<br>AAAATTAATGTTAACATTTT                                                       |
| pTY067 | GAL1-gRNA1     | AAAATGTTAACATTTAATTTTTTCTTTTTTATTTCGCTGTCAAAAATTCTC<br>GCTTCCTATGACTGTTTATGTTTCGTAACAACCGAAAAAAGCCGAAT<br>AAATAAACTAGAAGTAAGCT                                                      |
| pTY068 | GAL1-gRNA2     | TGCGCATGTTTCGGCGTTCGAAACTTCTCCGCAGTGAAAGATAAATGAT<br>CAACCAACTATAATTTAAGAGGTTTTAGAGCTAGAAATAGCAAGTTAAA<br>ATAAGGCTAGTCCGTTATCAAC                                                    |
| pTY069 | ELO3-gRNA1     | TGCGCATGTTTCGGCGTTCGAAACTTCTCCGCAGTGAAAGATAAATGAT<br>CTACATCCAATCTTACAAGAAGTTTTAGAGCTAGAAATAGCAAGTTAAA<br>ATAAGGCTAGTCCGTTATCAAC                                                    |
| pTY070 | ELO3-gRNA2     | TGCGCATGTTTCGGCGTTCGAAACTTCTCCGCAGTGAAAGATAAATGAT<br>CTACTCGTTATTATTGCGTATTTTGTGATGCTAAAGTTATGAGTAGAAAA<br>AAATGAGAAGTTGTTCTGAACAAAGTAAAAAAGAAGTATACTTATTT<br>CAAAGTCTTCAACAATTTTTC |
| pTY071 | ACC1repair-F   | TTTCGGTTTGTATTACTTCTTATTCAAATGTCATAAAAAGTATCAACAAAA<br>AATTGTTAATATACTCTATACTTTAACGTCAAGGAGAAAAAAGTATAAT<br>GAGCGAAGAAAGCTTATTCG                                                    |
| pTY072 | ACC1repair-R   | GAGCGAAGAAAGCTTATTCG                                                                                                                                                                |
| pTY073 | ACC1GAL1-upJDF | ACAAAGGGTTCTCGTAGAGTC                                                                                                                                                               |



|        |                |                                                                                              |
|--------|----------------|----------------------------------------------------------------------------------------------|
| pTY074 | ACC1GAL1-upJDR | AGGAACTGGAATGGACCGAG                                                                         |
| pTY075 | ACC1-DWjdf     | CTAGTTTATCTACTGTATTGAGG                                                                      |
| pTY076 | Elo3 JDF       | GTACTIONTACGAGGATTATCG                                                                       |
| pTY077 | Elo3 JDR       | GCAATTTTATTAGAGATAGTGG                                                                       |
| pTY078 | ELO3up-F       | CTGGGGTTAAGATAGCAACG<br>CGCTCGAAGGCTTTAATTTGCGGCCGGTACCCGACTGTTTATGTTTCGTA<br>AACAAAC        |
| pTY079 | ELO3up-R       | AACAAAC                                                                                      |
| pTY080 | CYC1-F         | GATACCGTCGACCTCGAGTC                                                                         |
| pTY081 | CYC1-R         | GGGTACCGGCCGCAAATTAAG<br>CTAATTACATGACTCGAGGTCGACGGTATC                                      |
| pTY082 | Elo2-F         | TTACCTTTTTCTTCTGTGTTG<br>CAAAAAAAAAAGTAAGAATTTTTGAAAATTCAATATAAAAAACAATGAAT<br>TCACTCGTTACTC |
| pTY083 | Elo2-R         | TCACTCGTTACTC                                                                                |
| pTY084 | Gal1andGal10-F | TTATATTGAATTTTCAAAAATT                                                                       |
| pTY085 | Gal1andGal10-R | TATAGTTTTTCTCCTTGACGT<br>CTATACTTTAACGTCAAGGAGAAAAACTATAAAAAACAATGGAATCTAA<br>TTGTGTTCAATTC  |
| pTY086 | AtFAR-F        | CTCATTAAAAAACTATATCAATTAATTTGAATTAACCTATTGTTTCAAAAC<br>ATGTGTGATC                            |
| pTY087 | AtFAR-R        | ATGTGTGATC                                                                                   |
| pTY088 | FBA1-F         | GTTAATTCAAATTAATTGATATAG                                                                     |
| pTY089 | FBA1-R         | AGTAAGCTACTATGAAAGACTTTAC<br>CGGCTTTTTCCGTTTGTTTACGAAACATAAACAGTC                            |
| pTY090 | Elo3updown-F   | ATAGGAAGCGAGAATTTTTGAC<br>CTTCGAGTTCTTTGTAAAGCTTTTCATAGTAGCTTACTATAGGAAGCGAG<br>AATTTTTGAC   |
| pTY091 | Elo3down-F     | AATTTTTGAC                                                                                   |
| pTY092 | Elo3down-R     | AGTTACTTGATATCCATGTTCC<br>CTTAGTATCACACTAATTGGCTTTTCGCGACTGTTTATGTTTCGTAAACA<br>AAC          |
| pTY093 | Elo3up-TDH2-R  | AAC                                                                                          |
| pTY094 | Elo3up-Fxin    | CTGGGGTTAAGATAGCAACG                                                                         |
| pTY095 | Elo3up-Rxin    | GACTGTTTATGTTTCGTAAACAAAC<br>GCTTTTTTCCGTTTGTTTACGAAACATAAACAGTCCGGATTAGAAGCCGC<br>CGAG      |
| pTY096 | Elo3upGAL1p-F  | CGAG                                                                                         |
| pTY097 | GAL1p-R        | TATAGTTTTTCTCCTTGACGTT<br>GTGCATATTTTCAAGAAGGATAGTAAGCTGGCAAACGGATTAGAAGCC<br>GCCGAG         |
| pTY098 | GAL7GAL1p-F    | GCCGAG<br>CGCTCGAAGGCTTTAATTTGCGGCCGGTACCCGACTGTTTATGTTTCGTA<br>AACAAAC                      |
| pTY099 | ELO3upcyc-R    | AACAAAC                                                                                      |
| pTY100 | GAL7-F         | TTTTGAGGGAATATTCAACTGTT<br>CGCTCGAAGGCTTTAATTTGCGGCCGGTACCCTTGCCAGCTTACTATCC<br>TTC          |
| pTY101 | GAL7 CYC1-R    | TTC                                                                                          |
| pTY102 | primer 6005    | GATCATTTATCTTTCCTGCGGAGAAG                                                                   |
| pTY103 | TDH2t-F        | ATTTAACTCCTTAAGTTACTTTAATGATTTAG                                                             |
| pTY104 | TDH2t-R        | GCGAAAAGCCAATTAGTGTGATAC<br>CTAAATCATTAAAGTAACTTAAGGAGTTAAATTTAATTGTTTTGTTGAT<br>CTTCTTC     |
| pTY105 | Elo1-F         | CTTCTTC                                                                                      |

pTY106 Elo1-R GATAAAAAAAAAACAGTTGAATATTCCTCAAAAAAAAAACAATGGTAAGTG  
ATTGGAAAAATTTTG

---

120

121

122 Supplementary Table 5 *S. cerevisiae* strains used in this study.

| Strain  | Genotype and plasmid                                                                 | Source           |
|---------|--------------------------------------------------------------------------------------|------------------|
| JV03    | MATa MAL2-8c <i>SUC2 ura3-52 HIS3 are1Δ dga1Δ are2Δ lro1Δ pox1Δ</i>                  | Ref <sup>4</sup> |
| TY001   | MATa MAL2-8c <i>SUC2 ura3-52 HIS3 are1Δ dga1Δ are2Δ lro1Δ pox1Δ elo3Δ</i>            | This work        |
| TY002   | MATa MAL2-8c <i>SUC2 ura3-52 HIS3 are1Δ dga1Δ are2Δ lro1Δ pox1Δ elo3Δ/pELO2</i>      | This work        |
| TY003   | MATa MAL2-8c <i>SUC2 ura3-52 HIS3 are1Δ dga1Δ are2Δ lro1Δ pox1Δ/pELO3</i>            | This work        |
| TDY7005 | Mata <i>lys2 ura3-52 trp1Δ leu2Δ elo2Δ::KAN elo3Δ::TRP1/pELO3</i>                    | Ref <sup>5</sup> |
| TY004   | Mata <i>lys2 ura3-52 trp1Δ leu2Δ elo2Δ::KAN elo3Δ::TRP1/pGPD415-MvFAS-AcpS</i>       | This work        |
| PWY12   | MATα <i>ura3Δ leu2Δ his3Δ trp1Δ can1Δ fas1Δ::HIS3 fas2Δ::LEU2</i>                    | Ref <sup>6</sup> |
| TY005   | MATα <i>ura3Δ leu2Δ his3Δ trp1Δ can1Δ fas1Δ::HIS3 fas2Δ::LEU2/pSPGM2-MvFAS-AcpS</i>  | This work        |
| TY006   | MATa MAL2-8c <i>SUC2 ura3-52 HIS3 are1Δ dga1Δ are2Δ lro1Δ pox1Δ elo3Δ/pVLCFAlc01</i> | This work        |
| TY007   | MATa MAL2-8c <i>SUC2 ura3-52 HIS3 are1Δ dga1Δ are2Δ lro1Δ pox1Δ elo3Δ/pVLCFAlc02</i> | This work        |
| TY008   | MATa MAL2-8c <i>SUC2 ura3-52 HIS3 are1Δ dga1Δ are2Δ lro1Δ pox1Δ elo3Δ/pVLCFAlc03</i> | This work        |
| TY009   | MATa MAL2-8c <i>SUC2 ura3-52 HIS3 are1Δ dga1Δ are2Δ lro1Δ pox1Δ elo3Δ/pVLCFAlc04</i> | This work        |
| TY010   | MATa MAL2-8c <i>SUC2 ura3-52 HIS3 are1Δ dga1Δ are2Δ lro1Δ pox1Δ elo3Δ/pVLCFAlc05</i> | This work        |
| TY011   | MATa MAL2-8c <i>SUC2 ura3-52 HIS3 are1Δ dga1Δ are2Δ lro1Δ pox1Δ elo3Δ/pVLCFAlc06</i> | This work        |
| TY012   | MATa MAL2-8c <i>SUC2 ura3-52 HIS3 are1Δ dga1Δ are2Δ lro1Δ pox1Δ elo3Δ/pVLCFAlc07</i> | This work        |
| TY013   | MATa MAL2-8c <i>SUC2 ura3-52 HIS3 are1Δ dga1Δ are2Δ lro1Δ pox1Δ elo3Δ/pVLCFAlc08</i> | This work        |
| TY014   | MATa MAL2-8c <i>SUC2 ura3-52 HIS3 are1Δ dga1Δ are2Δ lro1Δ pox1Δ elo3Δ/pVLCFAlc09</i> | This work        |
| TY015   | MATa MAL2-8c <i>SUC2 ura3-52 HIS3 are1Δ dga1Δ are2Δ lro1Δ pox1Δ elo3Δ/pVLCFAlc10</i> | This work        |
| TY016   | MATa MAL2-8c <i>SUC2 ura3-52 HIS3 are1Δ dga1Δ are2Δ lro1Δ pox1Δ elo3Δ/pDynCon01</i>  | This work        |
| TY017   | MATa MAL2-8c <i>SUC2 ura3-52 HIS3 are1Δ dga1Δ are2Δ lro1Δ pox1Δ elo3Δ/pDynCon02</i>  | This work        |
| TY018   | MATa MAL2-8c <i>SUC2 ura3-52 HIS3 are1Δ dga1Δ are2Δ lro1Δ pox1Δ elo3Δ/pDynCon03</i>  | This work        |
| TY019   | MATa MAL2-8c <i>SUC2 ura3-52 HIS3 are1Δ dga1Δ are2Δ lro1Δ pox1Δ elo3Δ/pDynCon04</i>  | This work        |
| TY020   | MATa MAL2-8c <i>SUC2 ura3-52 HIS3 are1Δ dga1Δ are2Δ lro1Δ pox1Δ elo3Δ/pDynCon05</i>  | This work        |
| TY021   | MATa MAL2-8c <i>SUC2 ura3-52 HIS3 are1Δ dga1Δ are2Δ lro1Δ pox1Δ elo3Δ/pDynCon06</i>  | This work        |

|        |                                                                                                               |                  |
|--------|---------------------------------------------------------------------------------------------------------------|------------------|
| TY022  | MATa MAL2-8c <i>SUC2 ura3-52 HIS3 are1Δ dga1Δ are2Δ lro1Δ pox1Δ elo3Δ</i> /pDynCon07                          | This work        |
| TY023  | MATa MAL2-8c <i>SUC2 ura3-52 HIS3 are1Δ dga1Δ are2Δ lro1Δ pox1Δ elo3Δ</i> /pDynCon08                          | This work        |
| TY024  | MATa MAL2-8c <i>SUC2 ura3-52 HIS3 are1Δ dga1Δ are2Δ lro1Δ pox1Δ elo3Δ</i> /pDynCon09                          | This work        |
| TY025  | MATa MAL2-8c <i>SUC2 ura3-52 HIS3 are1Δ dga1Δ are2Δ lro1Δ pox1Δ elo3Δ</i> /pDynCon10                          | This work        |
| TY026  | MATa MAL2-8c <i>SUC2 ura3-52 HIS3 are1Δ dga1Δ are2Δ lro1Δ pox1Δ elo3Δ</i> /pDynCon11                          | This work        |
| TY027  | MATa MAL2-8c <i>SUC2 ura3-52 HIS3 are1Δ dga1Δ are2Δ lro1Δ pox1Δ elo3Δ</i> /pDynCon12                          | This work        |
| IMX581 | MATa <i>ura3-52 can1Δ::cas9-natNT2 TRP1 LEU2 HIS3</i>                                                         | Ref <sup>7</sup> |
| TY028  | MATa <i>ura3-52 can1Δ::cas9-natNT2 TRP1 LEU2 HIS3 elo3Δ::AtFAR</i> /pROS10-gRNA:elo3                          | This work        |
| TY029  | MATa <i>ura3-52 can1Δ::cas9-natNT2 TRP1 LEU2 HIS3 elo3Δ::AtFAR ELO2</i> /pROS10-gRNA:elo3                     | This work        |
| TY030  | MATa <i>ura3-52 can1Δ::cas9-natNT2 TRP1 LEU2 HIS3 elo3Δ::AtFAR ELO2 ELO1</i> /pROS10-gRNA:elo3                | This work        |
| TY031  | MATa <i>ura3-52 can1Δ::cas9-natNT2 TRP1 LEU2 HIS3 gal1Δ::ACC1**</i> /pROS13-gRNA:gal1                         | This work        |
| TY032  | MATa <i>ura3-52 can1Δ::cas9-natNT2 TRP1 LEU2 HIS3 gal1Δ::ACC1** elo3Δ</i> /pROS10-gRNA:elo3                   | This work        |
| TY033  | MATa <i>ura3-52 can1Δ::cas9-natNT2 TRP1 LEU2 HIS3 gal1Δ::ACC1** elo3Δ::AtFAR</i> /pROS10-gRNA:elo3            | This work        |
| TY034  | MATa <i>ura3-52 can1Δ::cas9-natNT2 TRP1 LEU2 HIS3 gal1Δ::ACC1** elo3Δ::AtFAR ELO2</i> /pROS10-gRNA:elo3       | This work        |
| TY035  | MATa <i>ura3-52 can1Δ::cas9-natNT2 TRP1 LEU2 HIS3 gal1Δ::ACC1** elo3Δ::AtFAR ELO2 ELO1</i> /pROS10-gRNA:elo3  | This work        |
| TY036  | MATa <i>ura3-52 can1Δ::cas9-natNT2 TRP1 LEU2 HIS3 gal1Δ::ACC1** elo3Δ::AtFAR</i> /pSPGM2-MvFAS-AcpS           | This work        |
| TY037  | MATa <i>ura3-52 can1Δ::cas9-natNT2 TRP1 LEU2 HIS3 gal1Δ::ACC1** elo3Δ::AtFAR ELO2 ELO1</i> /pSPGM2-MvFAS-AcpS | This work        |

123

124 Note: For PWY12, in detail, for the  $\Delta fas1::HIS3$  disruption, about 1.2 kb of the *FAS1* upstream region  
125 together with 1.4 kb of the N-terminal part of the *FAS1* reading frame were replaced by the *HIS3*  
126 insertion marker. Similarly, 0.9kb of the *FAS2* upstream region together with 1.3 kb of the N-terminal  
127 part of the *FAS2* reading frame were replaced by the *LEU2* insertion giving the  $\Delta fas2::LEU2$  construct.

128

129

130

131

132

| Synthesized genes | Sequence (5'-3')                                                                                                                                                                                                                                                                                                                                                                                                                                                                                                                                                                                                                                                                                                                                                                                                                                                                                                                                                                                                                                                                                                                                                                                                                                                                                                                                                                                                                                                                                                                                                                                                                                                                                                                                                                                                                                                                                                                                                                                                                                                                                                                                                                                                                                                                                                                                                                                                                                                                                                                                                                                                                                                                                                                                                                                                                                                                                                                                                                                                                                                                                                                   |
|-------------------|------------------------------------------------------------------------------------------------------------------------------------------------------------------------------------------------------------------------------------------------------------------------------------------------------------------------------------------------------------------------------------------------------------------------------------------------------------------------------------------------------------------------------------------------------------------------------------------------------------------------------------------------------------------------------------------------------------------------------------------------------------------------------------------------------------------------------------------------------------------------------------------------------------------------------------------------------------------------------------------------------------------------------------------------------------------------------------------------------------------------------------------------------------------------------------------------------------------------------------------------------------------------------------------------------------------------------------------------------------------------------------------------------------------------------------------------------------------------------------------------------------------------------------------------------------------------------------------------------------------------------------------------------------------------------------------------------------------------------------------------------------------------------------------------------------------------------------------------------------------------------------------------------------------------------------------------------------------------------------------------------------------------------------------------------------------------------------------------------------------------------------------------------------------------------------------------------------------------------------------------------------------------------------------------------------------------------------------------------------------------------------------------------------------------------------------------------------------------------------------------------------------------------------------------------------------------------------------------------------------------------------------------------------------------------------------------------------------------------------------------------------------------------------------------------------------------------------------------------------------------------------------------------------------------------------------------------------------------------------------------------------------------------------------------------------------------------------------------------------------------------------|
| <i>MvFAS</i>      | <p>ATGACAATCAACGATCAACATAGAGCCGCCGCTGGTAGTGACTCAAGAAGTGGTCAAGACTT<br/> CGAACCTTTATCTGGTACACACGCCTTGGTAGATAGATTACATGCTGGTGAACCATACGCTGT<br/> CGCATTGGTGGTCAAGGTGGTCCTTGGTTAGAAAATTTGGAAGAATTAGTAACTCAGCTGG<br/> TATCGAATCTGAAATTCACAATTGGTAGCCGAAGCTGAATTAATGTTGGAACCATTGGCTAG<br/> AGAATTAGTTGTAGTCAGACCAATTGTTTCGAACCTATGAAGTGGATAAGAGCATTAGCTGC<br/> TGATGAACCATTGCCTGCCGCTAAAGATTTGACTACAGCAGCCATATCTGGTCCAGGTATCTT<br/> GTTAACACAAATGGCTGCACAAAGAGCTTTGAAGAGACAAGGTTTAGATTTGGACGCACACC<br/> CACCTGTTGCAATTGCCGGTCATTCACAAGGTGTAAGTCTGTCGAATCCTAAAAGCCGGTG<br/> GTGCTAGAGATGTTGAATTGTTAGCAATAGGTCAATTGATCGGTGCCGCTGGTTCCTTAGTTA<br/> GTAGAAGATGTGGTATGGTTGGTAGAGGTGACAGATCCCCTATGGTTAGTGTATTGAATGTT<br/> GACCCAGCAAGAATGGCCGAATTGTTAGACGAATTTGCTCAAGATGTTAGAAGTGTATTGCCA<br/> CCTGCATTATCAATCAGAAACGGTAGAAGATCCGTTGTAATTACTGGTACACCAGAACAATTA<br/> GCTAGATTCGAATTGTATTGCGAAAAGATTACCGAAAAGGAAGAAGCTGAAAGAAAAGAATAA<br/> GACTAGAGGTGGTGAATTTTACCAATATTCAATCAATTGAACGTGCAAGTTGGTTTTCA<br/> TACACCTAGATTGGCTGGTGGTATTGATTTGGTTAACGAATGGGCAGCCAGAAGTGGTTGG<br/> ATAGAGAATTAAGTAGAGAATTGACCGAAACTATCTTCGTAAGCCAGTTGATTGGGTATCAG<br/> AAGTCGAAGGTTTGGCTGCTGCTGGTGTAAATGGATTGTTGACTTAGTCCATCCGATACAG<br/> TCACCAGATTGACTGCACCTGTTATAAGAGGTTTAGGTATTGGTATAGTTGCTGCTGCTACAA<br/> GAGCTGGTCAAAGATCATTGTTTACTGTAGGTGCAGAACCAGCTGTCGCACCTGCCCTGGTCTT<br/> CTTATGCTCCAAAGCCTGTAGCCTTGCCAGATGGTTCTGTCAAAGCATCTACTAAGTTCACTAG<br/> ATTAACAGGTAGATCACCTATCTTGTTAGCTGGTATGACACCAACCACTGTCGATGCTAAAATT<br/> GTTGCTGCTGCTGCTAATGCAGGTCACTGGGCTGAATTGGCTGGTGGTCAAGTTACCGA<br/> AGAAATTTTTGATGCCAGAATCGCTGAATTAAGTCAATTGTTAGAACCAGGTAGAGCTGTTCA<br/> ATCAATAGTTTGTGTTTATGATCCATACTTGTGGAAGTTACAATTGGGTGGTAAAAGATTAGTT<br/> CAAAGGCTAGACAATCTGGTGCACCAATAGATGGTGTGCTGTTGTAAGTCTGGTATCCCTGAC<br/> TTAGAAGAAGCAGTTGATTGATCGAAGAATTGCATACAGTAGGTATATCAAACGTCGTTTTT<br/> AAACCAGGTACTGTTGATCAAATTAATCCGTAATCAAGATTGCAGCCGAAGTTCCTGGTAGA<br/> GATGTAATAGTCCACGTTGAAGGTGGTAGAGCTGGTGGTCATCACTCTGGGAAGATTTGGA<br/> TGACTTGTATTGTCTACTTATGGTGACTTGAGAAAGCATTCCAACATAACTATCTGTGTTGGT<br/> GGTGGTATAGGTACACCAGAAAGAGCTGCTGAATATTTGTCTGGTACTGGGCCAAAACCTTA<br/> CGGTTTTCCAGCTATGCCTGTAGATGGTATCTTGGTCGGTACTGCTGCTATGGCTACTTTAGAA<br/> GCCACAACCTCTCCAGCTGTTAAGCAATTATTGGTAGACACTACAGGTACTGATACATGGGTT<br/> GGTGTGTTAAAGCCATTTCTGGTATGGCTTCTGGTAGATCACAATTAGGTGCAGACATCCAT<br/> GAAATTGATAATACTGCTTCCAGATGCGGTAGATTATTGGATGAAGTTGCAGGTGACGCTGA<br/> CGCAGTAGCCGAAAGAAGAGACGAAATTATAGCAGCTATGGCTGATACTGCAAAACCACTACT<br/> TTGGTGACGTCGCTGATATGACATATTTGCAATGGTTACAAAGATACGTTGAATTGGCTATTG<br/> GTGACGGTGACAGTACCGCAGATACTGCTGCACCAGGTTCTCCTTGGTTAGCTGATACATGGA<br/> GAGAAAGATTTGAAGAAATGTTGACCAGAGCTGAAGCAAGATTACATGAAAAGGATAGTGG<br/> TCCTATCGAATCTTTGTTCCGCCGCTGGTCCAGAATCACAAGCATTGTTGGATAATCCTGATACA<br/> GCAATTGCAGCCTTATTGGCCAGATATCCAGATGCTGAAACAGTTAAATTGCACCCAGCTGAC<br/> GTCCATTTTTCGTTACCTTATGTAAAAAGCCAGGTAAACCTGTAAACTTTGTACCAGTCATTG<br/> ATAAGGACGTCAGAAGATGGTGGAGATCAGATTCATTATGGCAAGCCCATGACGCTAGATAC<br/> ACTGCTGATCAAGTCTGCATCATTCCAGGTACACAAGCCGTTGCTGGTATTACCAGAGTAGAC<br/> GAACCTGTCGGTGAATTATTGGATAGATTCAACAAGAAATCGTTGACAGAATTTGGCAACA</p> |

---

GGTGCCGAACCAGTACCTGTAGTCAGTAGAAGACAAGCAAGAGCCGATGTAGCTGGTCCTT  
AGCAGTTGTATTGGACTCTCCAGATGTTTTATGGGCCGGTAGAACTGCTGTTAATCCTGTACA  
CAGAATTGGTGCTCCAGGCGAATGGCAAGTCAATGATGTTCCAGGTAAACCTTCTGCAACACA  
TCCAAACACCGGTGCAAGATTAGAATTGGCCGGTGACGGTTCGGTTACCTTAAGTGTACCTTT  
GTCTGACATTTGGATAGATATCAGATTCACCTTTGCCAGCAACCACTGTTGATGGTGGTGCCCC  
TATCGTTACAGTAGAAGACGCTTCAACCGCAATGAGAGCCGTCTTGGCTATTGCTGCTGGTGT  
TGACGGTCCAGATGCATTACCTGCCGTTGAAAATTCAACCGCTACTGTCTCCGTTGAATGGGA  
CCCAGAAAAGGTCGCTGATCATAACAGGTGTTACAGCAACCTTTGGTGCTCCATTGGCACCTGG  
TTAACCTTGGTCCCAGATGCTTTGGTTGGTTTATGTTGGCCAGCTGTTTTGCCGCTGTTGGT  
TCAGCTTAACTGATGACGGTTTCCCAGTCGTTGAAGGTTTATTGTCCTTGGTTCATTTGGATC  
ACGCAGCCCATTTGTTGGCAACTATGCCTGCCACAAAATCTGAATTGACCGTTTCAGCTACTGC  
ATCTGCTGCTGTTGATACAGAAGTCGGTAGAGTAGTCCCAGTAGACGTCACCATCGCTGATTC  
TGAAGGTACAGTTTTGGCCACCTTAGGTGAAAGATTTGCTATTAGAGGTAGAAGTGGTGCAG  
TTGAATTAACAGATCCACCTAGAGCCGGTGGTGTATTACAGACAATGCTACTGATACTCCAA  
GAAGAAGAAGAAGAGATGTTGTAGTCAACGCACCTGTTGACATGTCAGCCTTCGCTGTTGTAT  
CCGGTGACCACAATCCAATACATACTGATAGAGCCGCTGCATTATTGGCTGGTTGAAAATGC  
CTATCGTTCACGGTATGTGGTTATCTGCCGCTGCACAACATGCAGTTACCGCCACTGATGGTA  
GAGCTACCCACCTGCAAGATTGGTTGGTTGGACTTCAAGATTTTTGGGTATGGTATTGCCAG  
GTGACGAAATTGAGTTTAGAGTAGACAGAGTTGGTATCGATAGAGGTGCTGAAATTGTTGAA  
GTAGCCGCTAAAGTAGGTGGTGAATTGGTCATGTCTGCAACTGCCCAATTAGCAGCCCCTAAA  
ACAGTTTATGCTTTCCAGGTCAAGGTATTCAATCAAAGGGTATGGGTATGGATGTCAGAGCA  
AGATCCAAGGCTGCAAGAGCTGTTTGGGACACAGCAGATAAGTTTACTAGAGAAACCTTAGG  
TTTCTCTGTTTTGCACGTCGTTAGAGATAACCCAAGTTTAAAGCTTCTGGTGTCCATTATC  
ATCACCTGAAGGTGTTTTATACTTGACTCAATCACTCAAGTTGCTATGGCAACAGTAGCCGC  
TGCACAAGTCGCCGAAATGAGAGAACAAGGTCTTTCGTAGAAGGTGCCATTGCTTGTGGTC  
ATAGTGTGCGGTGAATATACTGCATTGGCCTGCGTTTCTGGTGTATACGAATTACCAGCTTTATT  
GGAAGTAGTCTTTCACAGAGGTTCTAAGATGCATGACATTGTTCCAAGAGATGCTCAAGGTA  
GATCAAATTATAGATTGGCCGCTATCAGACCTTCCCAAATTGATTTGGATGACGCAGACGTTA  
AAGATTTATAGCCGAAATCAGTGATAGAAGTGGTGAATTTTTGGAAATCGTTAACTTCAACT  
TAAGAGGTTCTCAATACGCTATCGCAGGTAAGTGTGCTGGTTTGGAAAGCATTGGAAGCAGAA  
GTAGAAAAGAGAAGAGAATTGTCTGGTGGTAAAAGATCCTTTATTTAGTTCCAGGTATCGAT  
GTACCTTCCATTCCAGTGTGTTGAGAGTCGGTGTGCGGATTTTAGAAGAGCTTTAGAAAGA  
GTTATGCCAGATCCTAATGATCCAGACTTATTAGTAGGTAGATATATTCCTAACTTGGTCCCAA  
GACCTTTTACATTAGATAGAGACTTCGTACAAGAAATTAGAGATTTGGTCCCAGCAGAACCTT  
TAGACGAAATATTGGCTGATTACGACACTTGGAGAAACGAAAGACCAACGAATTATGTAGA  
AAATTGGTAATAGAATTATTGGCCTGGCAATTTGCTTCTCCTGTCAGATGGATCGAAACTCAA  
GATTTGTTGTTTATCGAAGAAGCAGCCGGTGGTTTGGGTGTTGAAAGATTCGTAGAAATTGG  
TGCAAGAATGCACCAACCGTTGCCGTTTAGCTGCAAACACTTTGAAATTGCCTGAATACTCT  
CATAACACAACCGAAGTATTGAACGCTGAAAGAGATGCCGCTGTCTTATTTGCAACAGATACC  
GACCCAGAACCTGATTTGGACGAACCAGCTGGTACTCTGCACCAGCTGCTGAAGCTGCACC  
AGCCGAAGCTGTTCCAGCCGCTCCAGCTGCTCCAGCTCCAGCTGCTGCTCCATCAGGTGGTCC  
AAGACCTGATGACATTACTTTGACGCCAGTGATGCTACAATGGCATTGATCGCCTTGTCTGC  
TAAGATCAGAATCGACCAAATCGAACCATTAGATTCCATAGAAAGTATAACTGATGGTGTCTC  
TTCAAGAAGAAACCAAATGTTGGTTGATTTGGGTTTCAAGATTAACCTTGGGTGCAATTGACGG  
TGCTGCTGAAGCAGATTTGGCCGGTTAAAAGCACAAGTTACAAAGTTGGCCAGAACCTATA  
AACCATTTGGTCTGTTTTAAGTGACGCTATAAATGATCAAGTCAGAACAGTTTTCGGTCCATC  
TGGTAAAAGACCTGCATACATCGGTGAAAGAGTCAAAAAGACTTGGGAATTGGGTGAAGGTT  
GGGTAAACACGTAACCGTCAAGTTGCTTTAGGTACTAGAGAAGGTTCCAGTGTAGAGGT

---

GGTGCATTGGGTGGTTACATGACGGTGCATTAGCCGATGCTGCTGCTGTTGATAAAGCTATT  
GATGCTGCTGTTTCTGCTGTTGCAGCCAGAAGAGGTGTAGCTGTCTCTTTGCCATCTGCTGCT  
GGTGCCGCTGGTGGTGTGTAGATAGTGCAGCCTTGGGTGAATTTGCTGAACAAGTAACCGG  
TCCTGATGGTGTCTTGGCATCTGCTGCAAGAACTATATTAGATCAATTGGGTTTGGGTGCTCC  
ATTCGTTACACCTGACGCTAGTGCAGATGCCGAATTGATTGATTTGGTTACCGCAGAATTGGG  
TTCTGACTGGCCAAGATTAGTTGCACCTGTATTCGATGGTAGAAAAGGCTGTTTTATTGGATGA  
CAGATGGGCTTCAGCTAGAGAAGATTTGGTTAGAATTTGGTTGATGGACGAAGGTGACATAG  
AAGCTGATTGGGTTAGATTGTCCGAAAGATTCGAAGGTGCAGGTGATGTCGTTGGTACTCAA  
GCCACTTATTGGCAGGGTAAAGCATTGGCCGCTGGTAGAAATGTTACAGCCTCTTTATATGCT  
AGAGCAGCCGCTGGTGCAGAAAACCCAGCCACTGGTAGATACCATGATGAAGTTGCAGTAGT  
CACAGGTGCCTCAAAGGTAGTATTGCAGCCTCAGTTGTAGCTCAATTATTGGATGGTGGTGC  
TACTGTCGTTGCAACTACATCCAAGTTAGATGACGCTAGATTGGCATTCTACAGAGAATTATA  
CAGAGATAACGCCAGATTCGGTGCTAAATTGTGGGTTTTACCAGCCAATATGGCTTCATACAA  
CGATATTGACGCTTTGGTGAATGGGTTGGTACAGAAACAAACCGAATCATTAGGTCCAAAATC  
CATACTTTGAAGGATGCTTTGACTCCTACATTATTGTTTCCATTGCTGCACCTAGAGTTGGT  
GGTGACTTGTGAGATGCTGGTTCAGAAAGTGAATGGAAATGAAAGTCTTATTGTGGGCAGT  
TCAAAGATTAATAGGTGGTTTGTCTCACATCTCTTCAGATAGAGACATTGCCGCTAGATTACAT  
GTAGTCTTGCCAGGTTACCTAATAGAGGCATGTTTGGTGGTGACGGTGCTTATGGTGAATCC  
AAGGCAGCCTTAGATGCAGTTGTAGCCAGATGGAAAGCTGAAACAAGTTGGGCACAAAGAG  
TTTCTTAGCCCACGCTTTGATAGGTTGGACTAGAGGTACAGGTTTGTATGGGTCATAACGACG  
TTATCGTAGATGCAGTAGAAGAAGCCGGTGTACCACTTACTCAACTGAACAAATGGCTTCCA  
TGTTATTGGACTTATGTGATGTTGAAACTAAGGTAGCTGCTGCTAGAGAACCAGTTCAAGCTG  
ATTTGACAGGTGGTTTGGCAGAAGCCGAATTAGATTTGAGTGCTTTGGCAACAAAAGCTAGA  
GAAGATGCAACCTCTGCCCCAGCTGATGACGCTGAAGATGACGAAGCTGCTGATCATTGATT  
GCCGCTTTGCCATCACCACTAGACCTGCTGTTACAGCACCAGCCCTGAATGGGCAGATTTG  
GACGTTGATCCAGCCGATATGGTCGTTATAGTAGGTGGTGCTGAATTAGTCTTATGGTTCC  
AGTAGAACTAGATACGAAATGGAAGTCGATAATGAATTGTCTGCTGCTGGTGTGTTTGAATTG  
GCTTGGACAACCGGTTTGATTAATGGGAAGATGACCCAAGACCTGGTTGGTATGACTCTGA  
TTCTGGTGAATTGATAGATGAATCAGAAATCGTTGAAAGATACCACGACGAAGTAGTCTCCA  
GATGCGGTATTAGAGAATTTGTTGATGACGGTGCTATAGACCCAGATCATGCAAGTCCTTAT  
TGGTCTCTGTTTTCTTAGACAAGGATTTTATGATTCGTTGTATCTTCAGAAGCTGATGCAAGAGC  
CTTTGTTGAATTTGACCCAGAACATACAGCTGCAAGACCAATCCCTGACTCTGGTACTGGGA  
AGTCATAAGAAAAGCTGGTACTGAAATCAGAGTTCCAAGAAAACTAAGTTGTCCAGAACAG  
TAGGTGCACAAATCCAACCGTTTTGATCCTACTGTTTGGGGTATCAGTCTGACATGGCTA  
CTTCTATTGATAGAGTTGCATTGTGGAATATAGTAGCCACAGTCGATGCATTTTTGTCTCTGG  
TTTACCCCAACTGAATTATTGAGATGGGTTACCCCTTACAAGTAGCTTCCACCCAAGGTA  
GGTATGGGTGGTATGACTAGTATGCAACAATGTATCATGGTAATTTGTTGGGTAGATCAAA  
GCCAAACGATATCTTACAAGAAGTTTTGCCTAACGTCGTTGCCGCTCACGTCATGCAAAGTTAT  
GTTGGTGGTTACGGTGCTATGGTTCATCCAGTAGCAGCCTGTGCTACTGTAGCAGTCTCTGTT  
GAAGAAGGTGTTGATAAGATCAGATTGGGTAAAGCCGAATTTGTAGTCGCTGGTGGTTTTCGA  
TGACTTAACCTTGAAGCTATAATCGGTTTTGGTGACATGGCTGCAACTGCCGATACAGAAAC  
CATGAGAGCAAAAGGTATCTCCGATTCAAGATTTTCAAGAGCTAATGACAGAAGAAGATTGG  
GTTTCTTAGAAGCTCAAGGTGGTGGTACTATTTTATTGGCAAACGGTGCTTTAGCATTGCAAA  
TGGGTTTGGCAGTTTTAGCTGTTGTAGGTTACGCACAAAGTTTTGCCGATGGTGTTCATACTTC  
TATACCAGCACCTGGTTTGGGTGGTTTGGTGTGCGATGACATCGCTGTGCTTAGTAAACACGACA  
CTTCTACATTAGCTAATGATCCAAACGAAACAGAAATTACATGAAAGATTGGCCGATGCTTTAG  
GTAGAGCACCAGGTAATCCTTTGTTGTCGATGCTCTCAAAAATCATTAACTGGTCACTCTAAGG

---

GTGGTGCCGCTGCATTCCAATTGATGGGTTTATGTCAAATGTTAAGAGATGGTGCATTCCAC  
CTAACAGATCATTGGACTGCGTTGATGACGAATTAGCCACTTCCGCTCATTTTGTGGCCAAAG  
AGAAACATTAAGATTGGGTGACAAATATCCTTTGAAGGCTGGTTTAGTTACAAGTTTGGGTTT  
TGGTCACGTTTCTGGTTTGATTGCCTTAGTACATCCACAAGCATTTTTGGCCGCTTTAGCACCT  
GAACAAAGAGCAGCCTACACTGCACAAGCCCAAGAAAGAGCTTTGGCAGGTCAAAGAAGATT  
AGCCTCTGCTATTGCAGGTGGTAGACCAATGTTTAAAAGACCTGCTGATAGAAGATTTCGACG  
GTGACCAACCAGAAAAGACTCAAGAAGCTGCTATGTTATTGGACCCTGCCTCAAGATTAGGT  
GAAAATGGTGTTCACAGAAGATGA

*AcpS* ATGTTGCCAGTCGGTATAGTTGGTATTGGTATTGATTTGGTTTCTATCCCAGAATTTGCAGAAC  
AAGTAGACAGACCTGGTACTGTCTTTGCTGAAACTTTACACCTGGTAAAAGAAGAGATGCTG  
CTGATAAATCTTCATCCGCCGCTAGACATTTGGCAGCCAGATGGGCTGCAAAAAGAAGCAGTA  
ATTAAGGCCTGGAGTGGTTCAAGATTCGCCAAGAGACCAGTCTTACCTGAAGCTATCCATAGA  
GATATCGAAGTTATTACAGACATGTGGGGTAGACCAAGAGTTAGATTGTCAGGTGCCGTAGC  
TGAACACTTAAAGGAAGTTACCATCCATTTGTCCTTAACCCACGAAGCTGATACTGCTGCTGCT  
GTTGCAGTATTGGAAGAAAAGATAA

*AtFAR* ATGGAATCTAATTGTGTTCAATTCTTGGGTAATAAGACTATCTTGATCACAGGTGCACCAGGTT  
TCTTGGCTAAGGTTTTGGTTGAAAAGATTTTGAGATTGCAACCAAATGTTAAGAAAATATATTT  
GTTGTTGAGAGCACCAGATGAAAAATCTGCTATGCAAAGATTGAGATCAGAAGTTATGGAAA  
TTGATTTGTTTAAAGTTTTGAGAAACAATTTGGGTGAAGATAATTTGAACGCTTTGATGAGAG  
AAAAGATTGTTCCAGTTCAGGTGACATCTCTATCGATAATTTGGGTTTGAAGGATACTGATTT  
GATCCAAAGAATGTGGTCAGAAATCGATATCATTATTAACATTGCTGCAACTACAACTTCGA  
TGAAAGATACGATATTGGTTTAGGTATTAATACATTCGGTGCATTAACGTTTTGAACTTCGCT  
AAGAAATGTGTTAAGGGTCAATTGTTGTTGCATGTTTCTACTGCTTACATTTCCAGGTGAACAAC  
CAGGTTTGTATTGGAAAAGCCTTTTAAAATGGGTGAAACATTGTCTGGTGACAGAGAATTAG  
ATATCAACATCGAACATGATTTGATGAAACAAAAATTGAAAGAATTGCAAGATTGTTCTGATG  
AAGAAATTTACAAACTATGAAGGATTTTGGTATGGCAAGAGCTAAATTGCATGTTGGCCA  
AACACTTATGTTTTACAAAGGCAATGGGTGAAATGTTGATGGGTAAATACAGAGAAAATTTG  
CCATTGGTTATTATCAGACCAACTATGATCACTTCTACAATTGCTGAACCATTTCCAGGTTGGA  
TCGAAGGTTTGAAGACATTGGATTGATTGTTGCTTATGGTAAAGGTAGATTGAAGTGTT  
TCTTGGCTGATTCTAATTCAGTTTTCGATTTGATCCCAGCAGATATGGTTGTTAATGCTATGGT  
TGCTGCTGCTACTGCACATTCAGGTGACACAGGTATTCAAGCTATCTATCATGTTGGTTCTTCA  
TGCAAGAACCAGTACTTTCCGTCAATTGCATGATTTACAGCAAGATACTTCGCTAAAAGA  
CCATTAATCGGTAGAAACGGTTCTCCAATCATCGTTGTTAAGGGTACTATCTATCTACAATGG  
CACAATTTTCATTGTACATGACATTGAGATACAAATTGCCATTGCAAATTTTAAAGATTGATTAA  
TATCGTTTACCCTTGGTCTCATGGTGACAACACTCTGATTTGTCAAGAAAAATTAATTTGGCT  
ATGAGATTGGTTGAATTGTACCAACCATACTTATTGTTTAAAGGTATTTTTGATGATTTGAATA  
CTGAAAGATTGAGAATGAAGAGAAAAGGAAAACATCAAAGAATTGGATGGTTCTTTTGAATTT  
GATCCAAAGTCAATCGATTGGGATAACTACATCACTAACACACATATCCCAGGTTTATCACA  
CATGTTTTGAAACAATAA

*AmFAR* ATGTCAACTATTTCCGATAATCAATGCACTTCCGTCAGAGACTTTTACAAGGACAGATCCATAT  
TCATCACTGGTGGTACAGGTTTCATGGGTAAAGTCTTGGTAGAAAAGTTGTTAAGATCCTGTC  
CAGGTATTAATAATATCTATATCTTGATGAGACCTAAAAAGAGTCAAGATATACAACAAAGAT  
TGCAAAAGTTGTTGGATGTTCCATTGTTTCGACAAGTTGAGAAGAGATACACCAGACGAATTGT  
TGAAGATCATCCCTATTGCTGGTGACGTTACCGAACATGAATTAGGTATCTCTGAAGCTGATC  
AAAATGTCATCATCAGAGACGTATCTATCGTTTTCCATTGAGCTGCAACTGTAAAGTTCGATGA  
ACCTTTGAAAAGATCTGTTACATCAACATGATTGGTACAAAGCAATTGTTGAATTTGTGTCAT  
AGAATGCACAACCTTAGAAGCCTTGATTCACGTTTCAACCGCTTATTGTAATTGCGATAGATAC



GACGTCGCAGAAGAAATCTATCCAGTATCTGCAGAACCTGAAGAAATCATGGCCTTGACTAA  
GTTGATGGATTCAAAATGATCGACAATATCACTCCAACATTGATTGGTAATAGACCTAACAC  
CTACACTTTTACAAAGGCATTGACAGAAAGAATGTTGCAATCCGAATGCGGTCATTTGCCAAT  
CGCTATTGTAAGACCTTCCATTGTTTATCTTCATTAGAGAACCAGTTAGTGGTTGGGTCGAT  
AATTTGAACGGTCCTACAGGTATTGTTGCCGCTGCAGGTAAAGGTTTCTTTAGATCTATGTTGT  
GTCAAAAGAATATGGTTGCTGATTTGGTTCCAGTCGACATCGTTATTAATTTGATGATCTGCAC  
CGCTTGGAGAACCGCAACTAACAGAACAAAAACCATTCCAATCTATCATTGTTGCACTGGTCA  
ACAAAATCCTATTACATGGCAACAATTCGTTGAATTAATCTTGAAGTACAACAGAATGCATCC  
ACCTAACGATACCATTGGTGGCCAGACGGTAAATGTCACACTTTCCGAATCGTCAACAACGT  
ATGCAAGTTGTTCCAACATTTGTTACCAGCCACATCTTGGATTTCAATTTAGATTGAGAGGT  
AAACCTGCTATCATGGTCGGTTTGCACGAAAAGATTGACAAGGCAGTAAAGTGTGGGAATA  
CTTCACTATGCAACAATGGAATTTAGAGATGACAACGTTAGACAATTATCCGGTGAATTGAG  
TCCAGAAGATAGACAAATTTTATGTTTCGATGTTAAGCAAATCGACTGGCCTTCTTATTTGGAA  
CAATACATCTTGGGTATAAGACAATTCATTATTAAGATTCTCCAGAAACATTGCCTGCCGCTA  
GATCACATATTAAGAAATTGACTGGATTCAAAAGGTTGTCGAATTCGGCATGTTGTTAGTAG  
TTTTGAGATTCTTGTGTTGAGAATCCAATGGCACAATCCGCCTGTTTCACTTTGTTGAGTGC  
TATATTAAGAATGTGCAGAATGATAGTTTAA

*CfFAR*

ATGGAAGTTAAACAACACTCACCAGTTGTTCAATTCTACGATAATAAGACAGTTTTTATTACAG  
GTGCTACTGGTTTTATGGGTAAAGTTTTGGTTGAAAAATTGTTAAGATCAACTAACATCTTGAA  
ATTGTTGTTGTTGATCAGACCAAAGAAAGGTGTTCAAACAGAACAAGATTGCAAACCTTTGTT  
ATCTTCATCTGTTTTCGATAGAGTTAGAGAAATCGATCCAGCTTTGTTAGAAAAGGTTGAAGTT  
GTTAACGGTGACATCACAGAAGATAATTTGGGTATCGATGAAGAAGCAGAAAGAATTTTAAAC  
AGAATCAGTTAACGTTGTTTTTCAATTGTGCTGCAACAGTTAGATTGATGAAGATTGACTAAG  
TCAGTTGCTATGAACGTTTCTGCTGTTTTGGCAATCATTGATTTGGCTAAGAAAACCTAAGAAAT  
TGGAAGCATTGGTTGATGTTTCAACTGCATACTGTAATTGTGATTTGAAAAATATCGATGAAA  
TCATATATCCACCACCAGGTAATCCAAGAGGTTTGGTTGATTGTTGTAAGTGGATGGATTCTG  
AAAAATTGGATGGTCCAGAAATGACAAAAATTATGATTGGTAACAGACCAAACACTTACACTT  
TACTAAAGCATTGGCAGAAGCTGTTTTACATACAGAAGGTGCTTCAATTGCCATTGGCAATCA  
TCAGACCATCTATCGTTACTGCTGCATGGAAAGAACCATTTCCAGGTTGGGTTGATAATTTTAA  
TGGTGCTACAGGTGTTTTGGCAGGTGCTGGTGCAGGTTTGTGAGAATTTGACTGTAAGA  
GATCATGTGTTGCAGATATGGTTCCAGTTGATGTTTGTATCAATTTGATGTGTGTTTTGGGTTG  
GAAAGCTGCATCACAACCAGCTTCTACTACACCAGTTTCAACTGTACATCTGGTGGTATTAAT  
CCAATTACTTGGGGTCAAGTTGAAGCATGGGGTTTGCAAAACATTGGTTGATAACCCATACCAA  
GATGTTTTCTGGTATCCAGGTGGTTCTTACAAAGAAAATTGGTATTTGAACAGATTTTCCAAT  
TGTTGTTCCATTATGGTCCAGCTCATTGTGTTGATTTGTTATGTAGATTGTCTGGTAGAAAGCC  
ATTTTTAGTTAAAATTTCAAACATGATGCAAAAATCTACTAAAGCATTGGAACCTTTTACTACA  
AATTCATGGAACCTGGTCTAACAACAACGTTGTTAAATTGGAAGGCGAATTAACAGTTGAAGAT  
AGAGCTGTTTTCGGTTTTCGATATCAAGACTGATTTTCGATTGGAAGGAATATTTGGCAATCTAT  
GTTCAAGGTATTAGAAAGTTCTTGTAAATCAGATCCATCTACTTTACCAGGTTCAAGAAGAT  
ACATGTAA

*ScFAR*

ATGGAAGAAATGGGTTCAATCTTGAATTCTTGGACAATAAGGCTATCTTGGTCACAGGTGCA  
ACAGGTAGTTTGGCTAAAACTTTGTTGAAAAAGTCTTGAGATCACAACCTAACGTTAAAAAG  
TTGATTTGTTGTTGAGAGCTACCGATGACGAAACTGCTGCATTGAGATTGCAAAACGAAGTT  
TTCGGTAAAGAATTGTTTAAAGTCTTGAAGCAAAATTTGGGTGCAAACCTTTTACTCTTTCGTAT  
CAGAAAAGGTTACCGTTGTCCAGGTGACATAACTGGTGAAGACTTGTGTTTGAAGGATGTT  
AATTTGAAGGAAGAAATGTGGAGAGAAATTGATGTAGTTGTCAACTTAGCCGCTACCATTAAT  
TTCATCGAAAGATACGACGTATCCTTGTGATTAACAATTACGGTGCAAAGTACGTTTTGGATT  
TCGCCAAAAGTGCAATAAGTTGAAGATCTTCGTCCATGTATCTACTGCTTACGTTTCAGGTGA

AAAGAATGGTTTGATCTTGAAAAAGCCTTATTACATGGGTGAATCTTTGAACGGTAGATTGGG  
TTTGATATCAACGTGAAAAAGAAATTGGTTGAAGCCAAGATTAATGAATTGCAAGCAGCCG  
GTGCTACAGAAAAATCCATTAAGAGTACCATGAAGGATATGGGTATAGAAAGAGCAAGACAC  
TGGGGTTGGCCAAATGTTTATGTCTTTACCAAAGCCTTGGGTGAAATGTTATTGATGCAATAC  
AAGGGTGACATTCCTTTGACAATAATCAGACCAACCATCATCACTTCTACATTCAAAGAACCAT  
TCCCTGGTTGGGTAGAAAGGTGTTAGAACAATAGATAACGTACCTGTTTACTACGGTAAAGGTA  
GATTGAGATGTATGTTATGCGGTCCTTCAACTATAATCGACTTAATCCCAGCTGATATGGTAGT  
TAACGCTACAATTGTCGCAATGGTAGCACATGCCAATCAAAGATATGTTGAACCAGTCACTTA  
CCACGTTGGTCTTCAGCTGCAAATCCTATGAAATTATCCGCCTTGCCAGAAATGGCTCATAGA  
TACTTCACAAAGAATCCATGGATAAACCTGATAGAAATCCAGTCCATGTAGGTAGAGCTATG  
GTCTTTCCAGTTTCAGTACTTTCCACTTGTATTTGACATTGAACTTTTTATTGCCATTGAAGGT  
TTTGAAATCGCAAACACAATTTTCTGTCAATGGTTCAAGGGTAAATACATGGACTTGAAGAG  
AAAGACCAGATTGTTGTTGAGATTGGTTGATATCTATAAACCTTACTATTTTTCCAAGGTATC  
TCGATGACATGAACACAGAAAAGTTAAGAATAGCCGCTAAGGAATCTATCGTTGAAGCTGA  
CATGTTTTATTTGATCCAAGAGCAATTAAGTGGGAAGATTATTTCTAAAAACTCACTTCTCT  
GGTGTGCTTGAACATGTATTGAACTAA

*TaFAR*

ATGGTTGATACATTGTCTGAAGAAAACATAATTGGTTACTTTAAAAATAAGTCCATCTTGATTA  
CTGGTTCCACAGGTTTCTGGGGCAAGATTTTGGTTGAAAAGATATTGAGAGTACAACCAGATG  
TTAAGAAAATATATTTGCCTGTCAGAGCAGTAGACGCTGCAGCCGCTAAACATAGAGTTGAA  
ACTGAAGTTGTCGGTAAAGAATTGTTGCGTTTGTGAGAGAAAAGCACGGTGGTAGATTCCA  
ATCATTATATGGGAAAAGATCGTCCCATTAGCTGGTGACGTAATGAGAGAAGATTCGGTGT  
AGACTCTGAAACATTAAGAGAATTGAGAGTTACCCAAGAATTAGATGTTATTGTCAATGGTGC  
AGCCACTACAACTTTTATGAAAGATACGATGTCGCATTGGACGTAAACGTTATGGGTGTAAA  
GCATATGTGTAACCTCGCCAAAAAGTGCCCAAACCTGAAGGTCTTGTACACGTATCTACCGC  
ATATGTAGCCGGTAAAAACAAGGTTTAGTTCAAGAAAGACCTTTTAAAGAATGGTGAACCTT  
GTTAGAAGGTACTAGATTGGATATAGACACAGAATTGAAGTTGGCTAAGGATTTGAAAAAGC  
AATTAGAAGCAGATGTTGACTCTTACCAAAGCTGAAAGAAAAGCAATGAAGGACTTAGGT  
TTGACAAGAGCAAGACATTTTAGATGGCCTAATACTTACGTTTTACAAAGAGTATGGGTGAA  
ATGGTCTTATCTCAATTGCAATGTGATGTACCAGTAGTTATAGTTAGACCTAGTATCATCACTT  
CTGTTCAAACGATCCATTGCCTGGTTGGATCGAAGGTACCAGAACTATTGACACAATCGTTA  
TCGGTTACGCCAAGCAAAAATTTGACTTACTTTTTAGCTGATTTGAACTTGACAATGGATGTCAT  
GCCAGGTGACATGGTCTGATAATGCCATGATGGCTGCAATCGTTGCTCATTCCAGTTCTTATT  
AGAAAAGACTAAGTCACATCCAAAGCAACACGCCCCTGCTGTTTACCACGTCTCCAGTTCTTTG  
AGAAATCCAGCACCTTATAACGTTTTACATGAAGCCGGTTTTAGATACTTACAGAACACCCA  
AGAGTTGGTCTGATGGTAGAACAGTCAGAACCATAAAAATGACCTTTTTGTCATCCATGGCT  
TCATTCCACTTGTTTCATGATGTTGAGATACAGATTGTTGTTGGAATTGTTGCATTTGTTGCCAT  
CTTGTGTTGCGTTTTGTTGCGTTTGGATACATTGTACCATGACCAAGCTAGAAAGTACAGATT  
CGTTATGCACTTGGTTGATTTGTACGGTCCATTTGCATTGTTCAAAGGTTGCTTCGATGACGTT  
AATTTGAACAAGTTGAGATTGGCTATGACCTCAAATCATGGTTCCTTGTAACTTCGATCCTA  
AAACTATAGATTGGGACGAATACTTCTACAGAGTCCACATACCAAGGTGTCATAAAAATACATGT  
TGAAATAA

134

135

136

137

138 Supplementary Table 7. Plasmids used in this study.

| Plasmids           | Genotype or characteristics | Base plasmid | Source           |
|--------------------|-----------------------------|--------------|------------------|
| pSPGM2             | pSPGM2                      | pSPGM2       | R&D systems      |
| pELO2              | pSPGM2-ELO2                 | pSPGM2       | This work        |
| pELO3              | pRS316-ELO3                 | pRS316       | Ref <sup>8</sup> |
| p415GPD            | p415GPD                     | p415GPD      | R&D systems      |
| pGPD415-MvFAS-AcpS | pGPD415-MvFAS-AcpS          | p415GPD      | This work        |
| pSPGM2-MvFAS-AcpS  | pSPGM2-MvFAS-AcpS           | pSPGM2       | This work        |
| pVLCFAIc01         | pSPGM2-AmFAR                | pSPGM2       | This work        |
| pVLCFAIc02         | pSPGM2-AtFAR                | pSPGM2       | This work        |
| pVLCFAIc03         | pSPGM2-CfFAR                | pSPGM2       | This work        |
| pVLCFAIc04         | pSPGM2-ScFAR                | pSPGM2       | This work        |
| pVLCFAIc05         | pSPGM2-TaFAR                | pSPGM2       | This work        |
| pVLCFAIc06         | pSPGM2-AmFAR-Elo2           | pSPGM2-ELO2  | This work        |
| pVLCFAIc07         | pSPGM2-AtFAR-Elo2           | pSPGM2-ELO2  | This work        |
| pVLCFAIc08         | pSPGM2-CfFAR-Elo2           | pSPGM2-ELO2  | This work        |
| pVLCFAIc09         | pSPGM2-ScFAR-Elo2           | pSPGM2-ELO2  | This work        |
| pVLCFAIc10         | pSPGM2-TaFAR-Elo2           | pSPGM2-ELO2  | This work        |
| p416GPD            | p416GPD                     | p416GPD      | R&D systems      |
| pDynCon01          | p416TDH3p-AtFAR             | p416GPD      | This work        |
| pDynCon02          | p416TEF1p-AtFAR             | p416GPD      | This work        |
| pDynCon03          | p416GAL1p-AtFAR             | p416GPD      | This work        |
| pDynCon04          | p416HXT7p-AtFAR             | p416GPD      | This work        |
| pDynCon05          | p416ADH2p-AtFAR             | p416GPD      | This work        |
| pDynCon06          | p416ICL1p-AtFAR             | p416GPD      | This work        |
| pDynCon07          | p416-ELO3-HXT1p-TDH3p-AtFAR | p416GPD      | This work        |
| pDynCon08          | p416-ELO3-HXT1p-TEF1p-AtFAR | p416GPD      | This work        |
| pDynCon09          | p416-ELO3-HXT1p-GAL1p-AtFAR | p416GPD      | This work        |
| pDynCon10          | p416-ELO3-HXT1p-HXT7p-AtFAR | p416GPD      | This work        |
| pDynCon11          | p416-ELO3-HXT1p-ADH2p-AtFAR | p416GPD      | This work        |
| pDynCon12          | p416-ELO3-HXT1p-ICL1p-AtFAR | p416GPD      | This work        |
| pROS10             | pROS10                      | pROS10       | Ref <sup>7</sup> |
| pROS10-gRNA:elo3   | pROS10-gRNA:elo3            | pROS10       | This work        |
| pROS13             | pROS13                      | pROS13       | Ref <sup>7</sup> |
| pROS13-gRNA:gal1   | pROS13-gRNA:gal1            | pROS13       | This work        |

139

140

141

142

143

144 Supplementary Table 8 Overview Fatty Acyl Reductase (FARs).

| Gene         | Species                     | NCBI accession | Primary substrate specificity | Reference         |
|--------------|-----------------------------|----------------|-------------------------------|-------------------|
| <i>AmFAR</i> | <i>Apis mellifera</i>       | CAD67815       | C22:0 C24:0 C26:0             | Ref <sup>9</sup>  |
| <i>AtFAR</i> | <i>Arabidopsis thaliana</i> | NP_197642.1    | C22:0                         | Ref <sup>9</sup>  |
| <i>CfFAR</i> | <i>Calanus finmarchicus</i> | AEO89345.1     | C20:0 C22:0 C24:0 C26:0       | Ref <sup>10</sup> |
| <i>ScFAR</i> | <i>Simmondsia chinensis</i> | AAD38039       | C20:0 C22:1                   | Ref <sup>9</sup>  |
| <i>TaFAR</i> | <i>Triticum aestivum</i>    | CAD30692.1     | C22:0                         | Ref <sup>11</sup> |

145

146

147

148 Reference

- 149 1. Boehringer, D., Ban, N. & Leibundgut, M. 7.5-angstrom Cryo-EM Structure of the  
150 Mycobacterial Fatty Acid Synthase. *J Mol Biol* **425**, 841-849 (2013).
- 151 2. Kaneda, K., Imaizumi, S. & Yano, I. Distribution of C22-, C24- and C26-alpha-unit-containing  
152 mycolic acid homologues in mycobacteria. *Microbiol Immunol* **39**, 563-570 (1995).
- 153 3. Rainey, F.A. & Oren, A. Taxonomy of Prokaryotes - Introduction. *Method Microbiol* **38**, 1-5  
154 (2011).
- 155 4. Oh, C.S., Toke, D.A., Mandala, S. & Martin, C.E. ELO2 and ELO3, homologues of the  
156 *Saccharomyces cerevisiae* ELO1 gene, function in fatty acid elongation and are required for  
157 sphingolipid formation. *J Biol Chem* **272**, 17376-17384 (1997).
- 158 5. Paul, S. et al. Members of the Arabidopsis FAE1-like3-ketoacyl-CoA synthase gene family  
159 substitute for the Elop proteins of *Saccharomyces cerevisiae*. *J Biol Chem* **281**, 9018-9029  
160 (2006).
- 161 6. Valle-Rodriguez, J.O., Shi, S.B., Siewers, V. & Nielsen, J. Metabolic engineering of  
162 *Saccharomyces cerevisiae* for production of fatty acid ethyl esters, an advanced biofuel, by  
163 eliminating non-essential fatty acid utilization pathways. *Appl Energ* **115**, 226-232 (2014).
- 164 7. Mans, R. et al. CRISPR/Cas9: a molecular swiss army knife for simultaneous introduction of  
165 multiple genetic modifications in *Saccharomyces cerevisiae*. *Yeast* **32**, S253-S253 (2015).
- 166 8. Wenz, P., Schwank, S., Hoja, U. & Schuller, H.J. A downstream regulatory element located  
167 within the coding sequence mediates autoregulated expression of the yeast fatty acid  
168 synthase gene FAS2 by the FAS1 gene product. *Nucleic Acids Res* **29**, 4625-4632 (2001).
- 169 9. Rowland, O. & Domergue, F. Plant fatty acyl reductases: Enzymes generating fatty alcohols  
170 for protective layers with potential for industrial applications. *Plant Sci* **193**, 28-38 (2012).
- 171 10. Teerawanichpan, P. & Qiu, X. Molecular and Functional Analysis of Three Fatty Acyl-CoA  
172 Reductases with Distinct Substrate Specificities in Copepod *Calanus finmarchicus*. *Mar*  
173 *Biotechnol* **14**, 227-236 (2012).
- 174 11. Wang, Y. et al. Molecular Characterization of TaFAR1 Involved in Primary Alcohol  
175 Biosynthesis of Cuticular Wax in Hexaploid Wheat. *Plant Cell Physiol* **56**, 1944-1961 (2015).

176
